# Supplementary material for: Greenhouse gas emissions from fen soils used for forage production innorthern Germany
Source: Copernicus journal article supplement (doi:10.5194/bg-13-5221-2016), 2016-09-20
Supplement: Supplementary file 1 [file bg-13-5221-2016-supplement.zip]

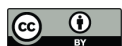

## *Supplement of*

# **Greenhouse gas emissions from fen soils used for forage production in northern Germany**

**Arne Poyda et al.**

*Correspondence to:* Arne Poyda ([a.poyda@uni-hohenheim.de](mailto:a.poyda@uni-hohenheim.de))

- [bg-13-5221-2016-supplement-title-page.pdf](#)
- [Data\\_set\\_Poyda\\_et\\_al.xlsx](#)

The copyright of individual parts of the supplement might differ from the CC-BY 3.0 licence.
